# Supplementary material for: Reply to Frański, R.; Beszterda-Buszczak, M. Comment on “Villalva et al. Antioxidant, Anti-Inflammatory, and Antibacterial Properties of an Achillea millefolium L. Extract and Its Fractions Obtained by Supercritical Anti-Solvent Fractionation against Helicobacter pylori. Antioxidants 2022, 11, 1849”
Source: MDPI journal article supplement (doi:10.3390/antiox12071384), 2023-07-04
Supplement: s1 [file s1]

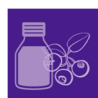**Table S1.** Phenolic compounds identified in yarrow samples by using HPLC-ESI-QTOF-MS.

| Phenolic compounds                            | Rt (min) | Theoretical mass (m/z) | Accurate mass (m/z) | MS/MS ions (m/z)                        |
|-----------------------------------------------|----------|------------------------|---------------------|-----------------------------------------|
| <i>Phenolic acids</i>                         |          |                        |                     |                                         |
| <i>Hydroxycinnamic acids</i>                  |          |                        |                     |                                         |
| Caffeic acid <sup>1</sup>                     | 18.0     | 179.0350               | 179.0353            | 135 (100)                               |
| Caftaric acid <sup>1</sup>                    | 13.8     | 311.0409               | 311.0410            | 179 (14), 149 (100)                     |
| Chlorogenic acid <sup>1</sup>                 | 15.0     | 353.0878               | 353.0877            | 191(100)                                |
| Cryptochlorogenic acid <sup>1</sup>           | 15.3     | 353.0878               | 353.0877            | 179(67), 173(100)                       |
| 1,5- DCQA <sup>1</sup>                        | 26.7     | 515.1195               | 515.1190            | 353 (100), 191 (40)                     |
| 3,4- DCQA <sup>1</sup>                        | 25.6     | 515.1195               | 515.1189            | 353 (100), 335 (30), 179 (69), 173 (80) |
| 3,5- DCQA <sup>1</sup>                        | 27.0     | 515.1195               | 515.1190            | 353 (100), 191 (55), 179 (35), 135 (21) |
| 4,5- DCQA <sup>1</sup>                        | 28.4     | 515.1195               | 515.1190            | 353 (100), 191 (10), 179 (30), 173 (40) |
| Ferulic acid <sup>1</sup>                     | 25.0     | 193.0510               | 193.0504            | 178 (50), 134 (100)                     |
| Neochlorogenic acid <sup>1</sup>              | 13.0     | 353.0878               | 353.0877            | 191 (100), 179 (76), 135 (40)           |
| Rosmarinic acid <sup>1</sup>                  | 28.9     | 359.0772               | 359.0771            | 197 (80), 179 (50), 161 (100), 135 (30) |
| <i>Flavonoids</i>                             |          |                        |                     |                                         |
| <i>Flavones</i>                               |          |                        |                     |                                         |
| Amentoflavone <sup>1</sup>                    | 39.5     | 537.0900               | 537.0821            | 375 (100), 443 (10), 417 (20)           |
| Apigenin <sup>1</sup>                         | 37.2     | 269.0455               | 269.0454            | 269 (90), 151 (18), 117 (20), 113 (35)  |
| Apigenin-C-hexoside-C-pentoside               | 19.5     | 563.1406               | 563.1401            | 473 (40), 443 (30)                      |
| Apigenin-7-O-glucoside <sup>1</sup>           | 27.8     | 431.0984               | 431.0980            | 269 (100)                               |
| Diosmetin <sup>1</sup>                        | 37.8     | 299.0561               | 299.0554            | 284 (55), 256 (12)                      |
| Homoorientin <sup>1</sup>                     | 18.9     | 447.0933               | 447.0930            | 429 (30), 357 (100), 327 (80)           |
| 6-Hydroxyluteolin- 7-O-glucoside              | 20.0     | 463.0882               | 463.0880            | 301 (100)                               |
| Luteolin <sup>1</sup>                         | 33.8     | 285.0405               | 285.0400            | 175 (80), 151 (100), 107 (51)           |
| Luteolin-6,8-di-C-glucoside                   | 19.7     | 609.1461               | 609.1453            | 489 (100), 325 (40)                     |
| Luteolin-7- $\beta$ -glucuronide <sup>1</sup> | 24.1     | 461.0725               | 461.0722            | 285 (100)                               |
| Luteolin-7-O-glucoside <sup>1</sup>           | 23.8     | 447.0933               | 447.0928            | 285 (100)                               |
| Schaftoside <sup>1</sup>                      | 18.4     | 563.1406               | 563.1401            | 473 (20), 443 (30)                      |
| Schaftoside isomer                            | 18.2     | 563.1406               | 563.1401            | 473 (40), 443 (20)                      |
| Vicenin <sup>2</sup> <sup>1</sup>             | 16.0     | 593.1512               | 593.1513            | 473 (100)                               |
| Vitexin <sup>1</sup>                          | 22.4     | 431.0984               | 431.0981            | 311 (100)                               |
| <i>Flavonols</i>                              |          |                        |                     |                                         |
| Casticin <sup>1</sup>                         | 45.7     | 373.0929               | 373.0923            | 358 (43), 343 (90)                      |
| Centaureidin                                  | 40.1     | 359.0772               | 359.0770            | 344 (59), 229 (100)                     |
| Methoxyquercetin isomer                       | 35.4     | 315.0510               | 315.0508            | 301 (100)                               |
| Quercetin <sup>1</sup>                        | 34.1     | 301.0354               | 301.0352            | 151 (60)                                |
| Rutin <sup>1</sup>                            | 22.1     | 609.1097               | 609.1093            | 301 (100)                               |

Rt, retention time. <sup>1</sup> Comparison against its authentic standard.
